# Supplementary material
Source: PubMed Central journal article supplement (PMC7486342)
Supplement: mmc4.pdf [file mmc4.pdf]

## Author statements

Please insert the relevant text under the subheadings below. A completed form must be signed by all authors. Please note that we will accept hand-signed and electronic (typewritten) signatures. Please complete multiple forms if necessary, and upload the signed copy with your submission.

**Manuscript title:** A Clinical Pilot Study on the Safety and Efficacy of Aerosol Inhalation Treatment of IFN- $\kappa$  plus TFF2 in patients with Moderate COVID-19

**Corresponding author:** Jianqing Xu

**Article type:** Article

I irrevocably authorise and grant my full consent to the corresponding author of the manuscript to: (1) enter into an exclusive publishing agreement with Elsevier on my behalf, in the relevant form set out at [www.elsevier.com/copyright](http://www.elsevier.com/copyright); and (2) unless I am a US government employee, to grant an exclusive license of rights to Elsevier as part of that publishing agreement, effective on acceptance of the article for publication. If the article is a work made for hire, I am authorized to confirm this on behalf of my employer. I agree that the copyright status selected by the corresponding author for the article shall apply and that this agreement is subject to the governing law of England and Wales.

Does your manuscript have a reference number? No  Yes  If yes, enter number here: eclinm-D-20-00282

Does your manuscript have a handling editor? No  Yes  If yes, enter name here: Claudia Schaefer

### Authors' contributions

Please insert here the contribution each author made to the manuscript—eg, literature search, figures, study design, data collection, data analysis, data interpretation, writing etc. If all authors contributed equally, please state this. The information provided here must match the contributors' statement in the manuscript.

XZ, TZ, JX, and HL designed the study and had full access to all data in the study and take responsibility for the integrity of the data and the accuracy of the data analysis. WF and YL contributed to writing of the report. JX contributed to critical revision of the report. YL and WF contributed to the statistical analysis, JX, XZ and WF provided the purified proteins. LX, MW, ZY, JC, LL, YL, FS are the clinical doctors, responsible for carrying out this trial by communicating with the patients and their family, ML, LW, LZ, RJ, JY are the nurses, responsible for the implementation of patients' aerosol inhalation. ZS, HH, XC, XM are responsible for providing the data of viral load, and collecting clinical characteristics of the enrolled patients. CS check the language. All authors reviewed and approved the final version.

## Role of the funding source

Please disclose any funding sources and their role, if any, in the writing of the manuscript or the decision to submit it for publication. Examples of involvement include: data collection, analysis, or interpretation; trial design; patient recruitment; or any aspect pertinent to the study. Please also comment whether you have been paid to write this article by a pharmaceutical company or other agency. If you are the corresponding author, please indicate if you had full access to all the data in the study and had final responsibility for the decision to submit for publication. The information provided here must match the role of the funding source statement in the manuscript.

This work was supported by National Natural Science Foundation of China (81771704), the National Major Project for Control and Prevention of Infectious Disease in China (2018ZX10301403-003), The Second Batch of Emergency Science and Technology Projects of Shanghai Science and Technology Commission (20411950200), and Shanghai Municipal Health Commission Special Emergency Project for Prevention and Treatment of Novel Coronavirus Pneumonia by Traditional Chinese Medicine (2020NCP001). The funder of the study had no role in study design, data collection, data analysis, data interpretation, or writing other report. The corresponding authors had full access to all the data in the study and had final responsibility for the decision to submit for publication.

## Conflicts of interest

Please complete the ICMJE conflict of interest form, which is available at <http://www.thelancet.com/for-authors/forms#icmje-coi>. Please ensure that a conflict of interest statement is included at the end of the manuscript, which matches what is declared on the ICMJE conflict of interest form.

## Patient consent (if applicable) - completion of this section is mandatory for Case Reports, Clinical Pictures, and Adverse Drug Reactions.

Please sign below to confirm that all necessary consents required by applicable law from any relevant patient, research participant, and/or other individual whose information is included in the article have been obtained in writing. **The signed consent form(s) should be retained by the corresponding author and NOT sent to EClinicalMedicine.**

I agree with: the plan to submit to *EClinicalMedicine*; the contents of the manuscript; to being listed as an author; and to the conflicts of interest statement as summarised. I have had access to all the data in the study (for original research articles) and accept responsibility for its validity.

|                               |                     |                                                                                                  |                |
|-------------------------------|---------------------|--------------------------------------------------------------------------------------------------|----------------|
| Title and name: Hongzhou Lu   | Highest degree: MD  | Signature: 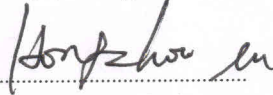 | Date: 20200628 |
| Title and name: Jianqing Xu   | Highest degree: MD  | Signature:  | Date: 20200628 |
| Title and name: Tongyu Zhu    | Highest degree: MD  | Signature:  | Date: 20200628 |
| Title and name: Xiaoyan Zhang | Highest degree: MD  | Signature:  | Date: 20200628 |
| Title and name: Weihui Fu     | Highest degree: PhD | Signature:  | Date: 20200628 |
| Title and name: Yan Liu       | Highest degree: MD  | Signature:  | Date: 20200628 |
| Title and name: Lu Xia        | Highest degree: MS  | Signature:  | Date: 20200628 |
| Title and name: Min Li        | Highest degree: BS  | Signature:  | Date: 20200628 |
| Title and name: Zhigang Song  | Highest degree: MS  | Signature:  | Date: 20200628 |
| Title and name: Huiliang Hu   | Highest degree: MS  | Signature:  | Date: 20200628 |

## Corresponding author declaration

I JIANGQING XU, the corresponding author of this manuscript, certify that the contributors' and conflicts of interest statements included in this paper are correct and have been approved by all co-authors.



## Role of the funding source

Please disclose any funding sources and their role, if any, in the writing of the manuscript or the decision to submit it for publication. Examples of involvement include: data collection, analysis, or interpretation; trial design; patient recruitment; or any aspect pertinent to the study. Please also comment whether you have been paid to write this article by a pharmaceutical company or other agency. If you are the corresponding author, please indicate if you had full access to all the data in the study and had final responsibility for the decision to submit for publication. The information provided here must match the role of the funding source statement in the manuscript.

This work was supported by National Natural Science Foundation of China (81771704), the National Major Project for Control and Prevention of Infectious Disease in China (2018ZX10301403-003), The Second Batch of Emergency Science and Technology Projects of Shanghai Science and Technology Commission (20411950200), and Shanghai Municipal Health Commission Special Emergency Project for Prevention and Treatment of Novel Coronavirus Pneumonia by Traditional Chinese Medicine (2020NCP001). The funder of the study had no role in study design, data collection, data analysis, data interpretation, or writing other report. The corresponding authors had full access to all the data in the study and had final responsibility for the decision to submit for publication.

## Conflicts of interest

Please complete the ICMJE conflict of interest form, which is available at <http://www.thelancet.com/for-authors/forms#icmje-coi>. Please ensure that a conflict of interest statement is included at the end of the manuscript, which matches what is declared on the ICMJE conflict of interest form.

**Patient consent (if applicable) - completion of this section is mandatory for Case Reports, Clinical Pictures, and Adverse Drug Reactions.** Please sign below to confirm that all necessary consents required by applicable law from any relevant patient, research participant, and/or other individual whose information is included in the article have been obtained in writing. **The signed consent form(s) should be retained by the corresponding author and NOT sent to EClinicalMedicine.**

I agree with: the plan to submit to *EClinicalMedicine*; the contents of the manuscript; to being listed as an author; and to the conflicts of interest statement as summarised. I have had access to all the data in the study (for original research articles) and accept responsibility for its validity.

|                                |                    |                                  |                |
|--------------------------------|--------------------|----------------------------------|----------------|
| Title and name: Zongguo Yang   | Highest degree: MD | Signature: <u>Zongguo Yang</u>   | Date: 20200628 |
| Title and name: Lin Wang       | Highest degree: BS | Signature: <u>Lin Wang</u>       | Date: 20200628 |
| Title and name: Xiaobo Cheng   | Highest degree: MD | Signature: <u>Xiaobo Cheng</u>   | Date: 20200628 |
| Title and name: Mei Wang       | Highest degree: MS | Signature: <u>Mei Wang</u>       | Date: 20200628 |
| Title and name: Rongrong Jiang | Highest degree: BS | Signature: <u>Rongrong Jiang</u> | Date: 20200628 |
| Title and name: Li Liu         | Highest degree: MD | Signature: <u>li liu</u>         | Date: 20200628 |
| Title and name: Xiaoting Mao   | Highest degree: BS | Signature: <u>Xiaoting Mao</u>   | Date: 20200628 |
| Title and name: Jun Chen       | Highest degree: MD | Signature: <u>Jun Chen</u>       | Date: 20200628 |
| Title and name: Yun Ling       | Highest degree: MD | Signature: <u>Yun Ling</u>       | Date: 20200628 |
| Title and name: Lin Zhang      | Highest degree: MS | Signature: <u>Lin Zhang</u>      | Date: 20200628 |

## Corresponding author declaration

I JIANQING XU, the corresponding author of this manuscript, certify that the contributors' and conflicts of interest statements included in this paper are correct and have been approved by all co-authors.

### Role of the funding source

Please disclose any funding sources and their role, if any, in the writing of the manuscript or the decision to submit it for publication. Examples of involvement include: data collection, analysis, or interpretation; trial design; patient recruitment; or any aspect pertinent to the study. Please also comment whether you have been paid to write this article by a pharmaceutical company or other agency. If you are the corresponding author, please indicate if you had full access to all the data in the study and had final responsibility for the decision to submit for publication. The information provided here must match the role of the funding source statement in the manuscript.

This work was supported by National Natural Science Foundation of China (81771704), the National Major Project for Control and Prevention of Infectious Disease in China (2018ZX10301403-003), The Second Batch of Emergency Science and Technology Projects of Shanghai Science and Technology Commission (20411950200), and Shanghai Municipal Health Commission Special Emergency Project for Prevention and Treatment of Novel Coronavirus Pneumonia by Traditional Chinese Medicine (2020NCP001). The funder of the study had no role in study design, data collection, data analysis, data interpretation, or writing other report. The corresponding authors had full access to all the data in the study and had final responsibility for the decision to submit for publication.

### Conflicts of interest

Please complete the ICMJE conflict of interest form, which is available at <http://www.thelancet.com/for-authors/forms#icmje-coi>. Please ensure that a conflict of interest statement is included at the end of the manuscript, which matches what is declared on the ICMJE conflict of interest form.

### Patient consent (if applicable) - completion of this section is mandatory for Case Reports, Clinical Pictures, and Adverse Drug Reactions.

Please sign below to confirm that all necessary consents required by applicable law from any relevant patient, research participant, and/or other individual whose information is included in the article have been obtained in writing. **The signed consent form(s) should be retained by the corresponding author and NOT sent to EClinicalMedicine.**

I agree with: the plan to submit to *EClinicalMedicine*; the contents of the manuscript; to being listed as an author; and to the conflicts of interest statement as summarised. I have had access to all the data in the study (for original research articles) and accept responsibility for its validity.

|                                   |                    |                                     |                |
|-----------------------------------|--------------------|-------------------------------------|----------------|
| Title and name: Jin Yan           | Highest degree: BS | Signature: <u>Jin Yan</u>           | Date: 20200628 |
| Title and name: Fei Shan          | Highest degree: MD | Signature: <u>Fei Shan</u>          | Date: 20200628 |
| Title and name: Corklin Steinhart | Highest degree: MD | Signature: <u>Corklin Steinhart</u> | Date: 20200628 |
| Title and name:                   | Highest degree:    | Signature: .....                    | Date:          |
| Title and name:                   | Highest degree:    | Signature: .....                    | Date:          |
| Title and name:                   | Highest degree:    | Signature: .....                    | Date:          |
| Title and name:                   | Highest degree:    | Signature: .....                    | Date:          |
| Title and name:                   | Highest degree:    | Signature: .....                    | Date:          |
| Title and name:                   | Highest degree:    | Signature: .....                    | Date:          |
| Title and name:                   | Highest degree:    | Signature: .....                    | Date:          |

### Corresponding author declaration

I JIANPING XU, the corresponding author of this manuscript, certify that the contributors' and conflicts of interest statements included in this paper are correct and have been approved by all co-authors.
